# Supplementary material
Source: publisher figshare collection journal article supplement (https://frontiersin.figshare.com/ndownloader/files/30926860)

# Sequence Distribution [Biological Process]

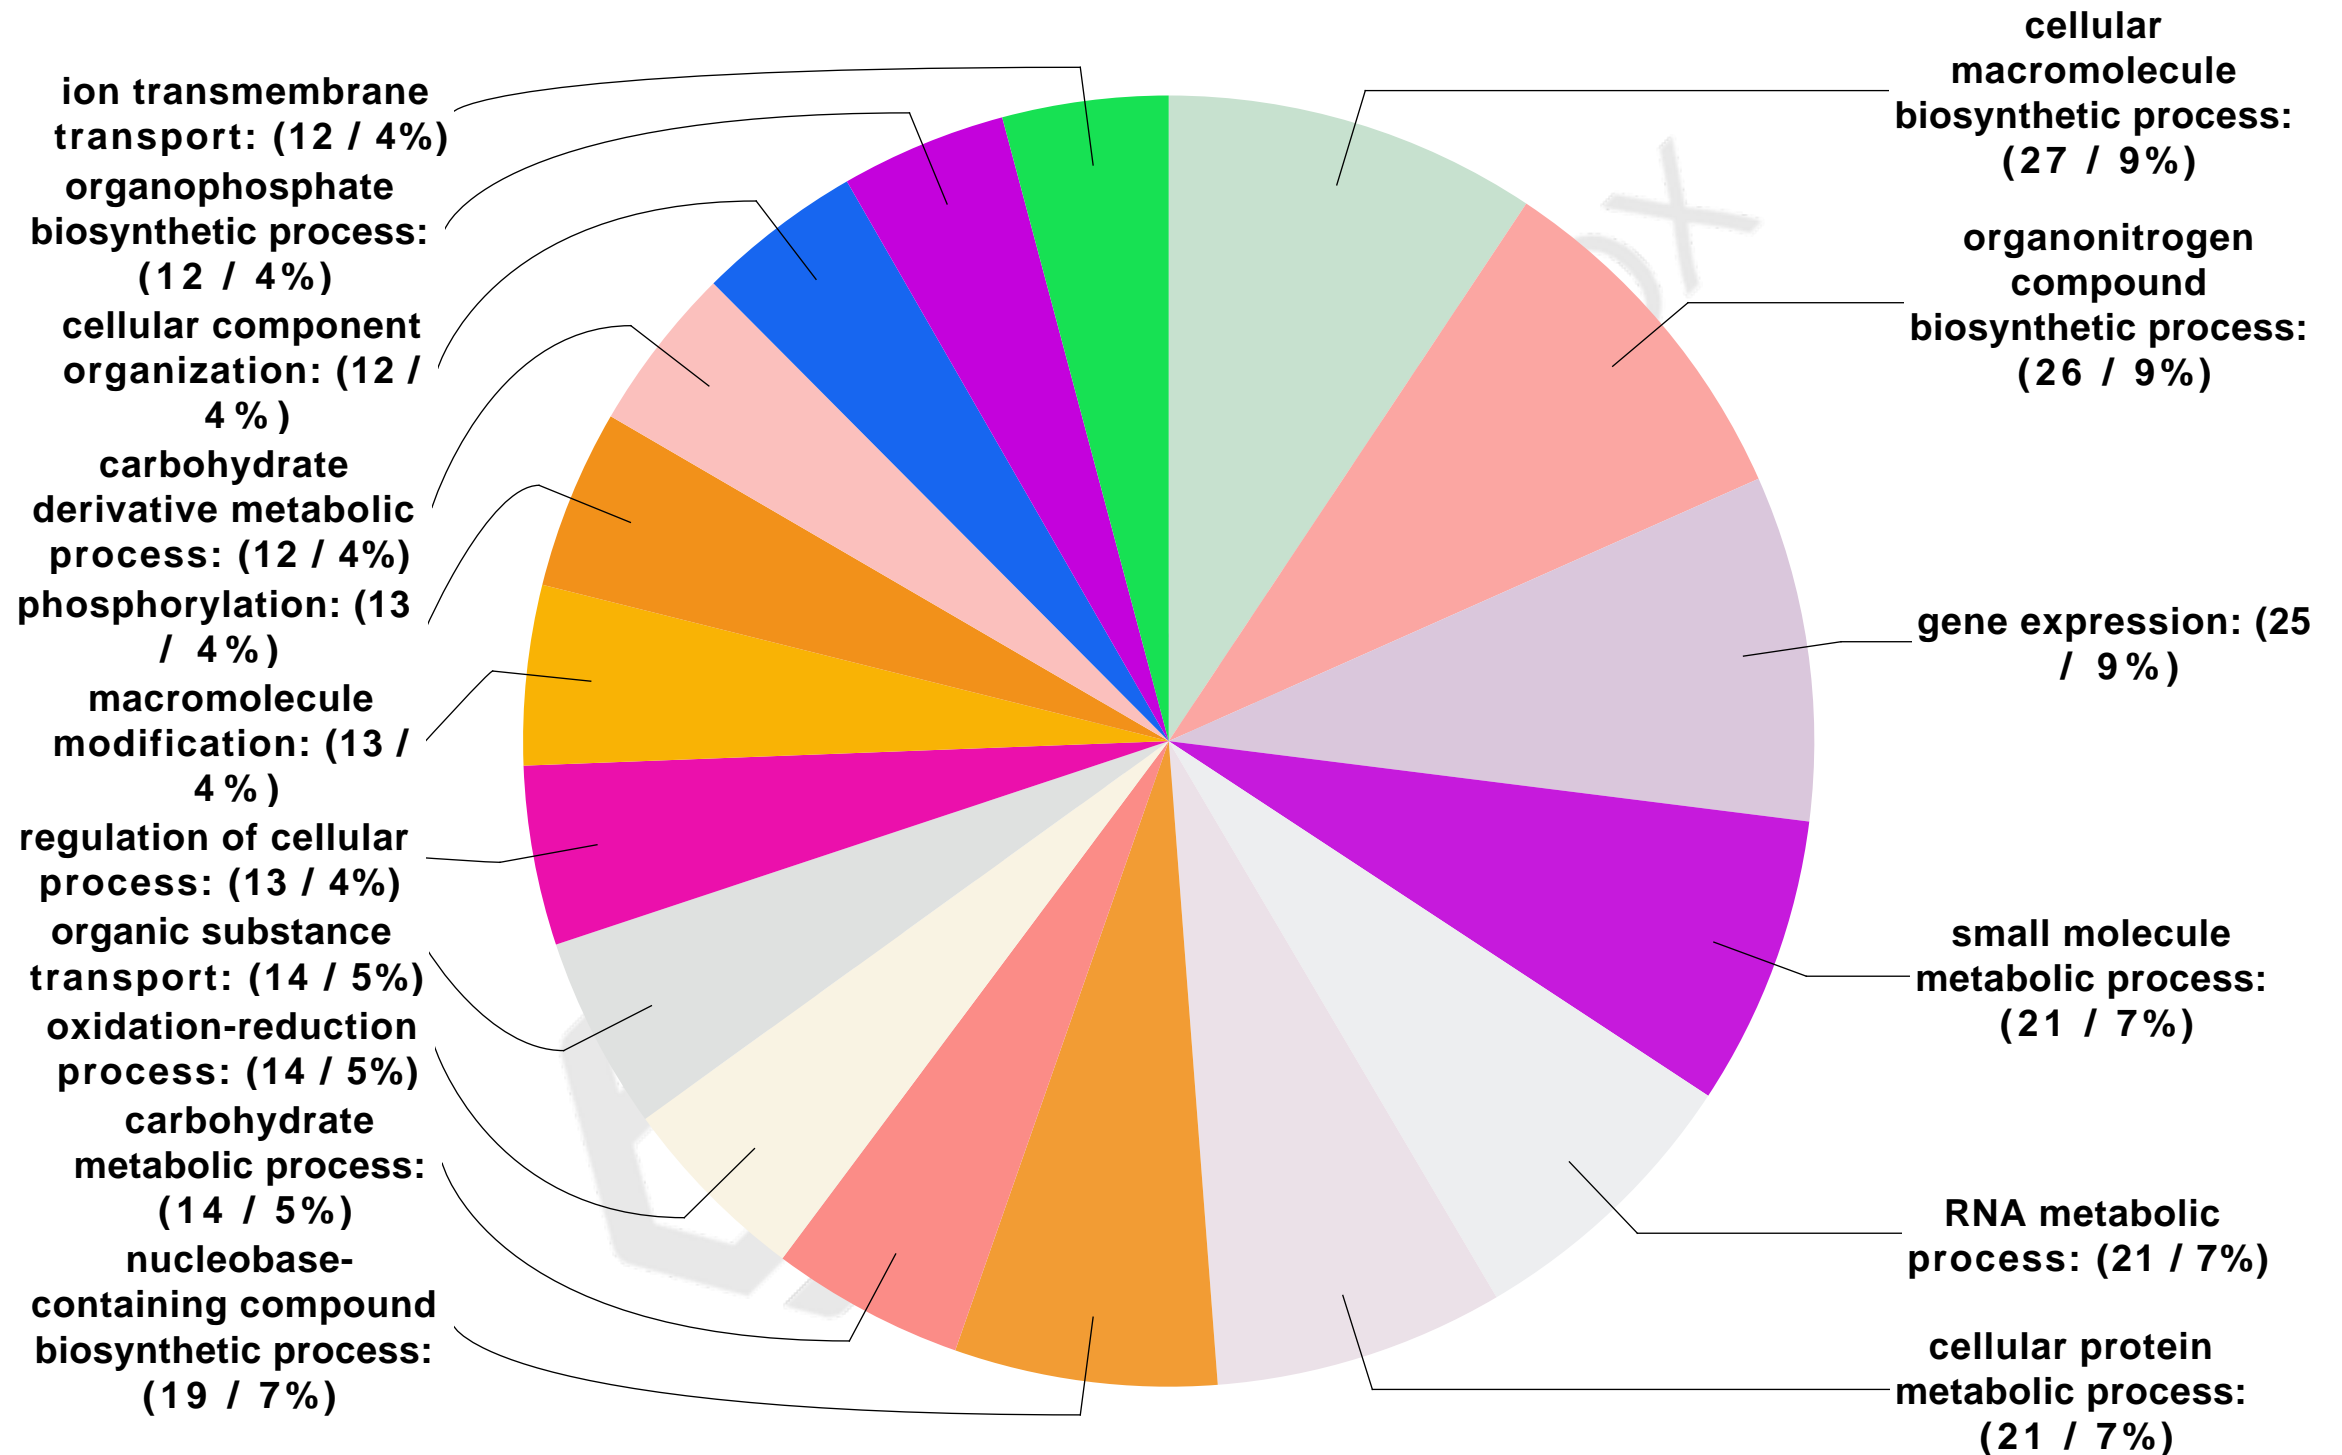

Supplement: Supplementary file [file 30926860]
